# Supplementary material for: Single-cell transcriptomics reveals heterogeneity and intercellular crosstalk in human intervertebral disc degeneration
Source: PubMed Central journal article supplement — iScience. 2023 Apr 19;26(5):106692. doi: 10.1016/j.isci.2023.106692 (PMC10192848; doi:10.1016/j.isci.2023.106692), 2023-04-19
Supplement: mmc1.pdf [file mmc1.pdf]

iScience, Volume 26

## **Supplemental information**

### **Single-cell transcriptomics reveals heterogeneity and intercellular crosstalk in human intervertebral disc degeneration**

**Dandan Wang, ZiZhang Li, Weimin Huang, Shengnan Cao, Liangyu Xie, Yuanzhen Chen, Huazhong Li, Lei Wang, Xiaoshu Chen, and Jian-Rong Yang**

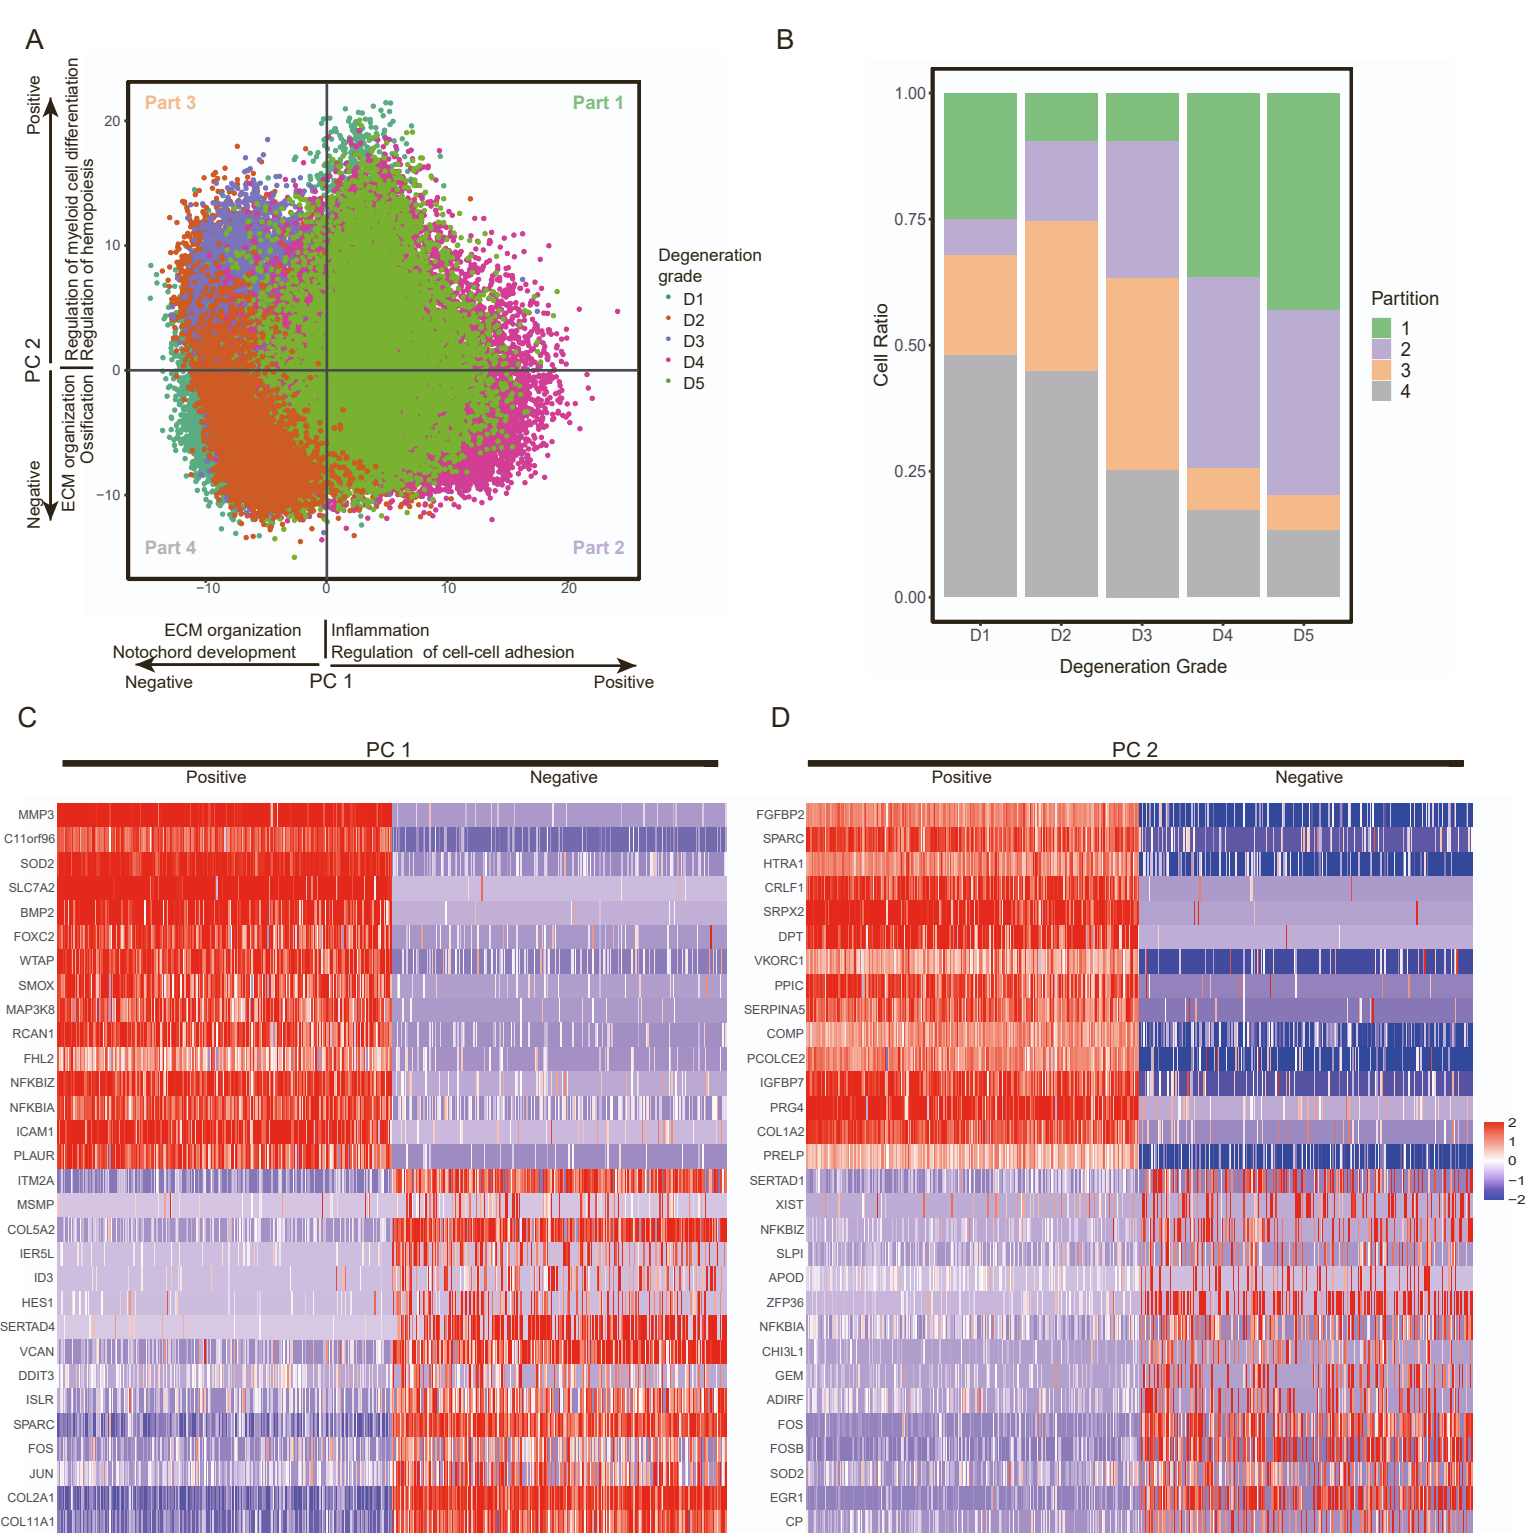

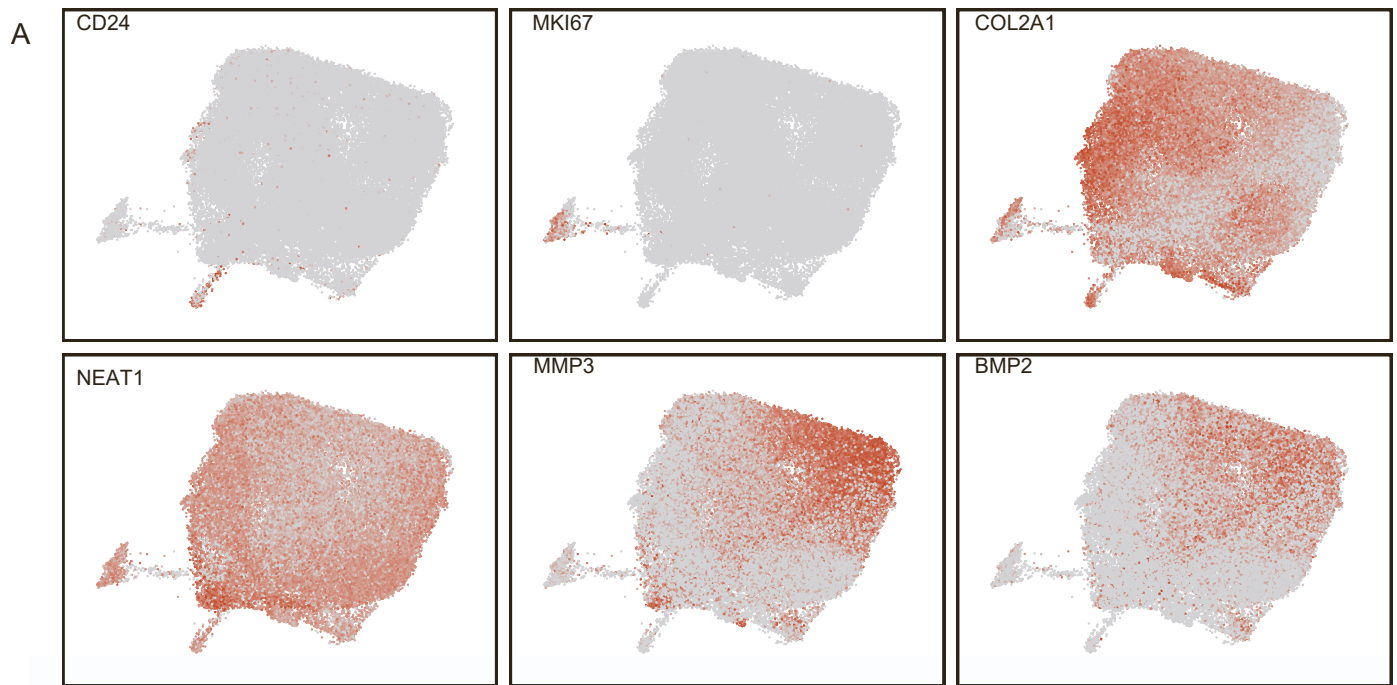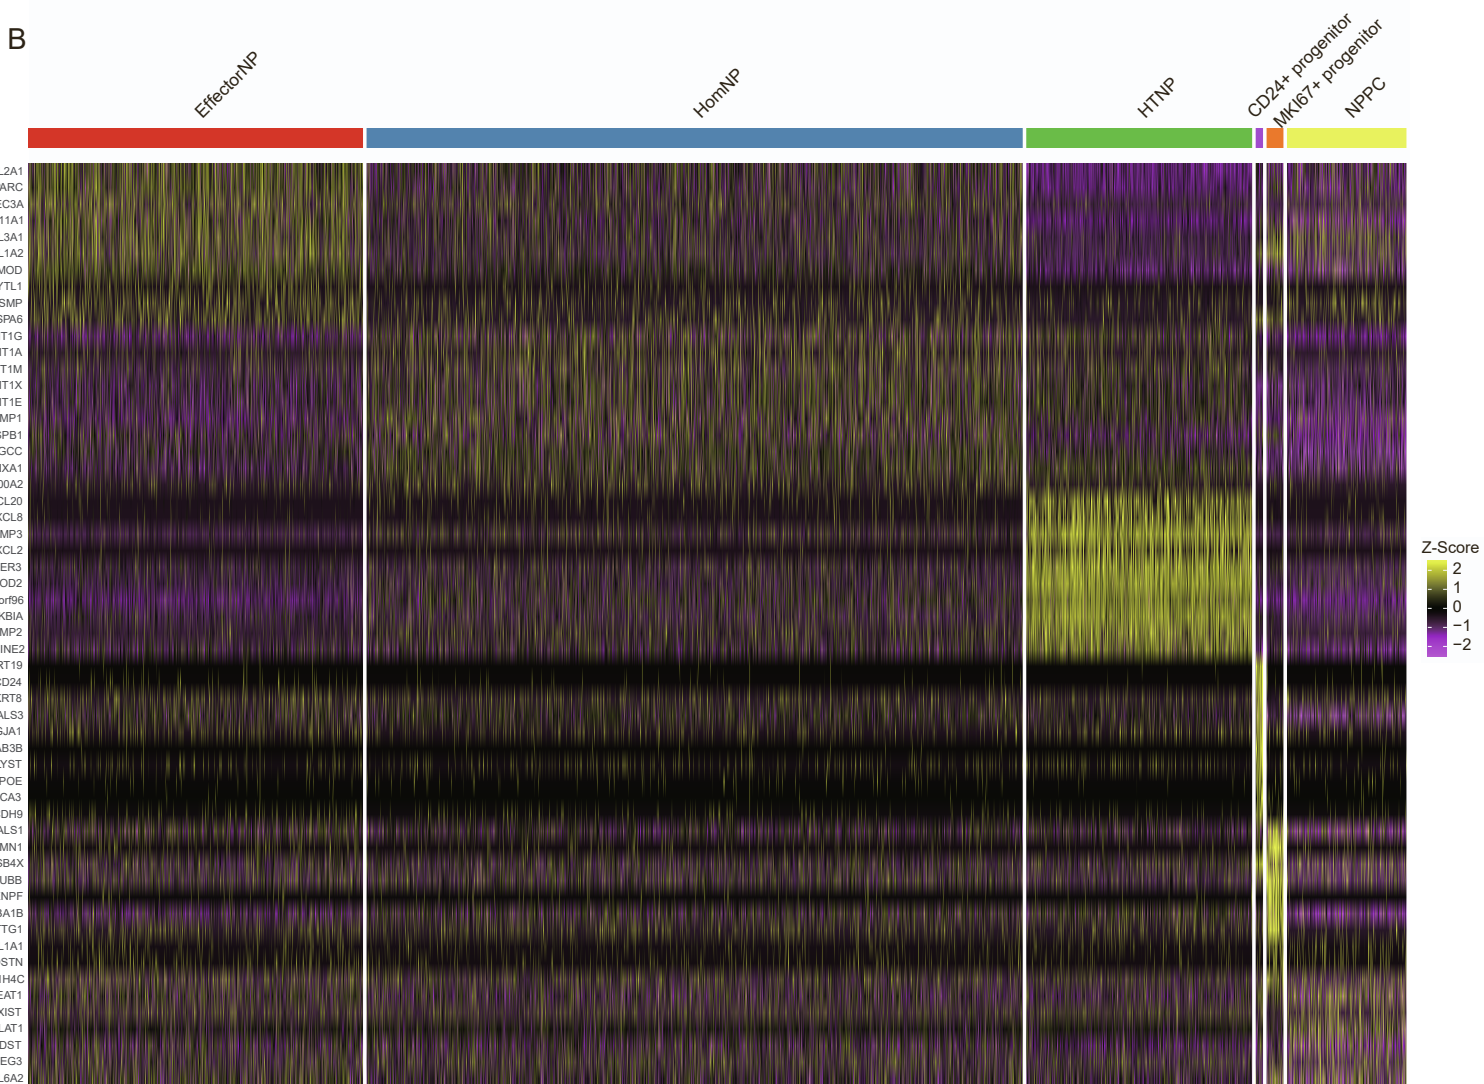

**Supplementary Fig. 2 The expression and heatmap of marker genes of NP subclusters, Related to Figure 2.**

(A) The average expression of curated feature genes for cell clusters defined in Figure 2 A on the UMAP map. (B) Heatmap showing the scaled expression of differentially expressed genes of NP subclusters defined in Figure 2 A.

A

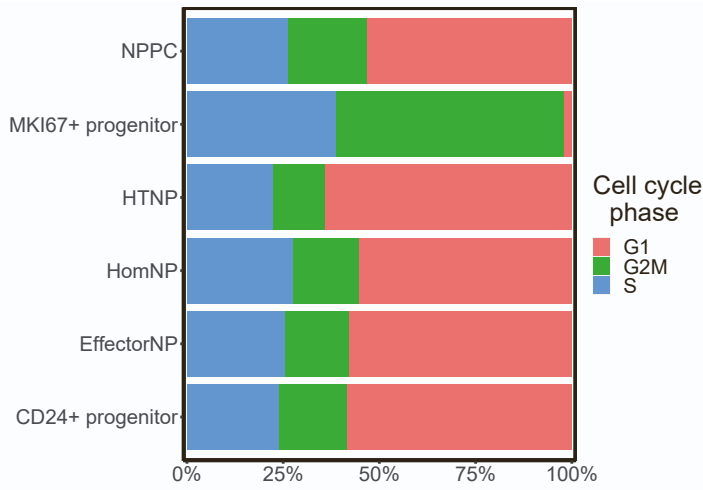

B

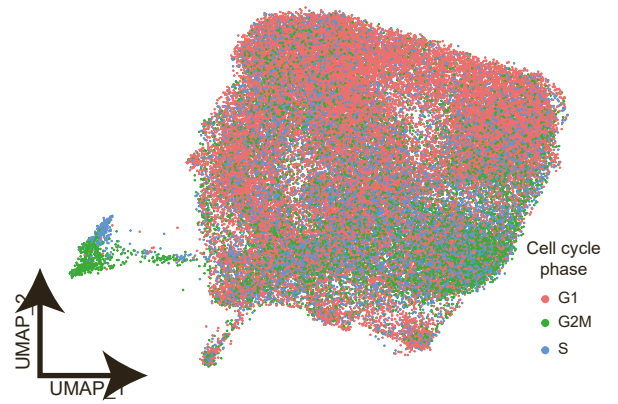

C

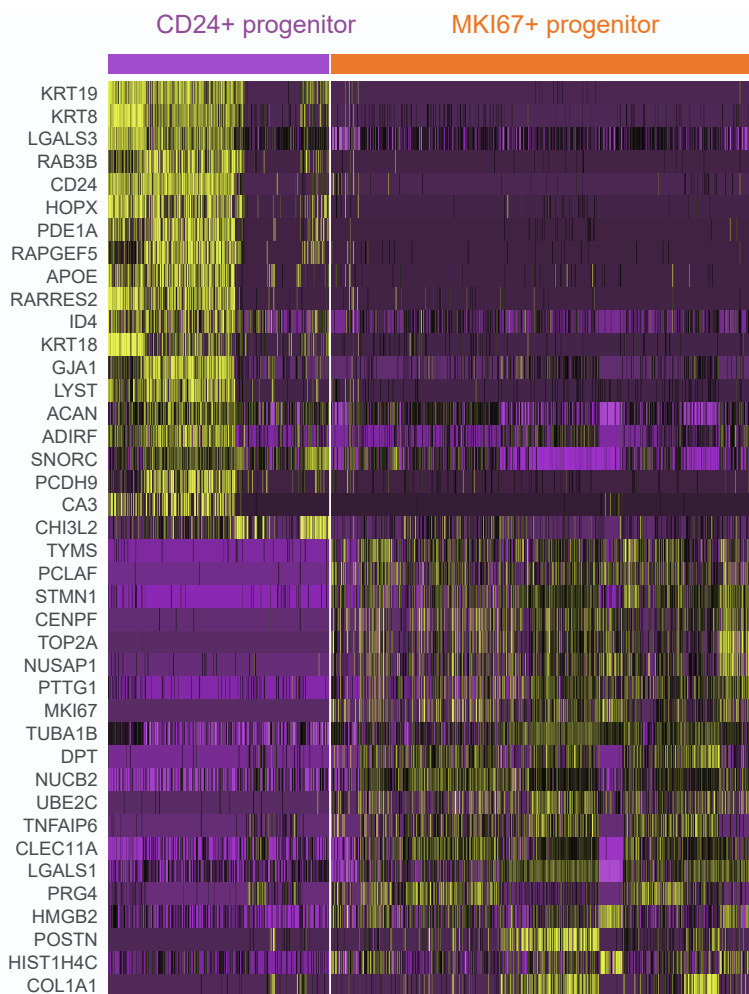

D

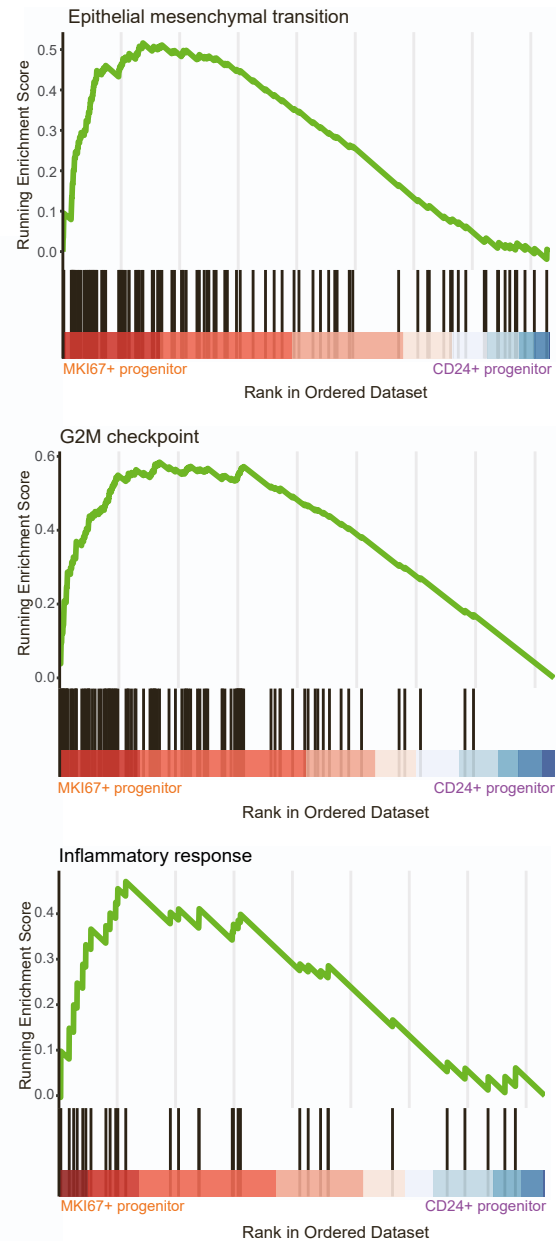

**Supplementary Fig. 3 The functional comparison and DEGs of CD24+ progenitor and MKI67+ progenitor, Related to Figure 2and Figure 3.**

(A) The distribution of NP cell clusters in different cell cycle phase. MKI67+ progenitor showing more percentage in G2/M phase.

(B) UMAP plot showing the distribution of NP cell clusters and colored according to the different cell cycle phase.

(C) Heatmap showing the scaled expression of differentially expressed genes of CD24+ progenitor and MKI67+ progenitor.

(D) Gene Set Enrichment Analysis (GSEA) dataset showing the main functional difference between CD24+ progenitor and MKI67+ progenitor.

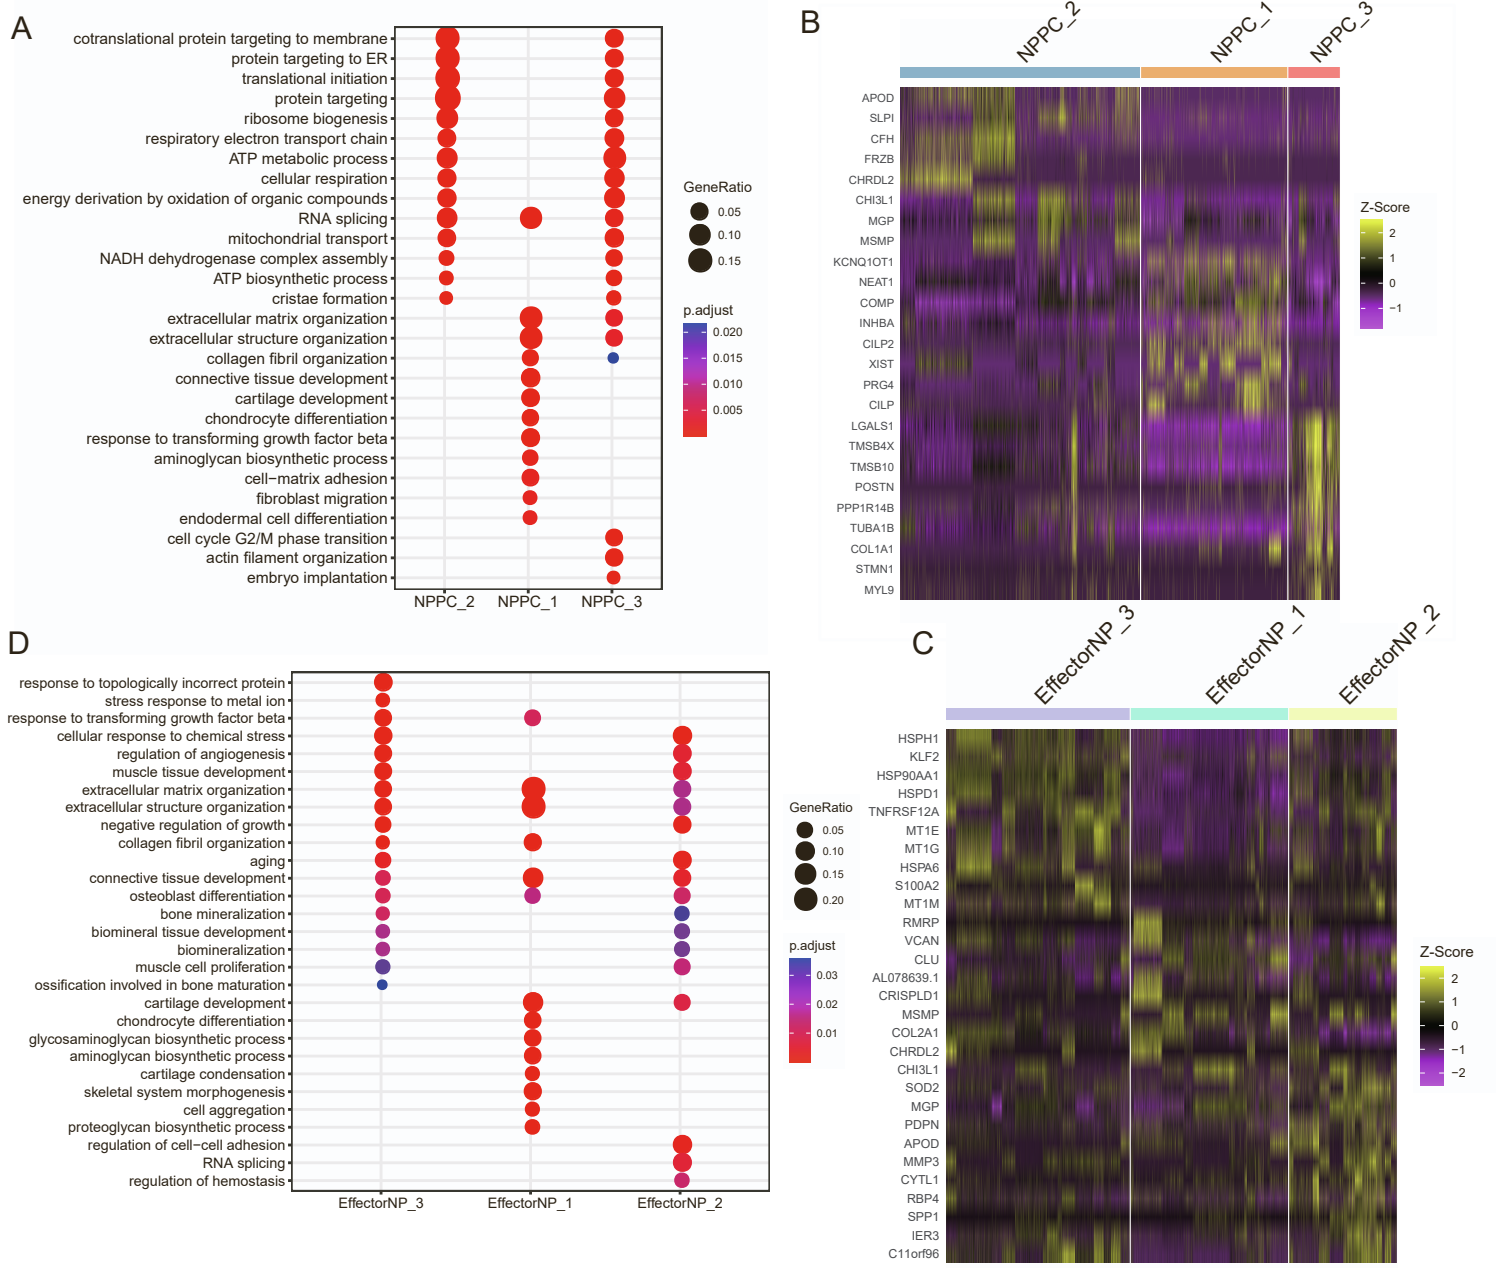

**Supplementary Fig. 4 GO functions and heatmap of the expression of differentially expressed genes of NPPC\_1-3 and EffectorNP\_1-3, Related to Figure 3.**

(A) GO functions of NPPC\_1-3 clusters. (B) Heatmap showing the scaled expression of differentially expressed genes of NPPC\_1-3 clusters. (C) GO functions of EffectorNP\_1-3 clusters.(D) Heatmap showing the scaled expression of differentially expressed genes of EffectorNP\_1-3clusters.



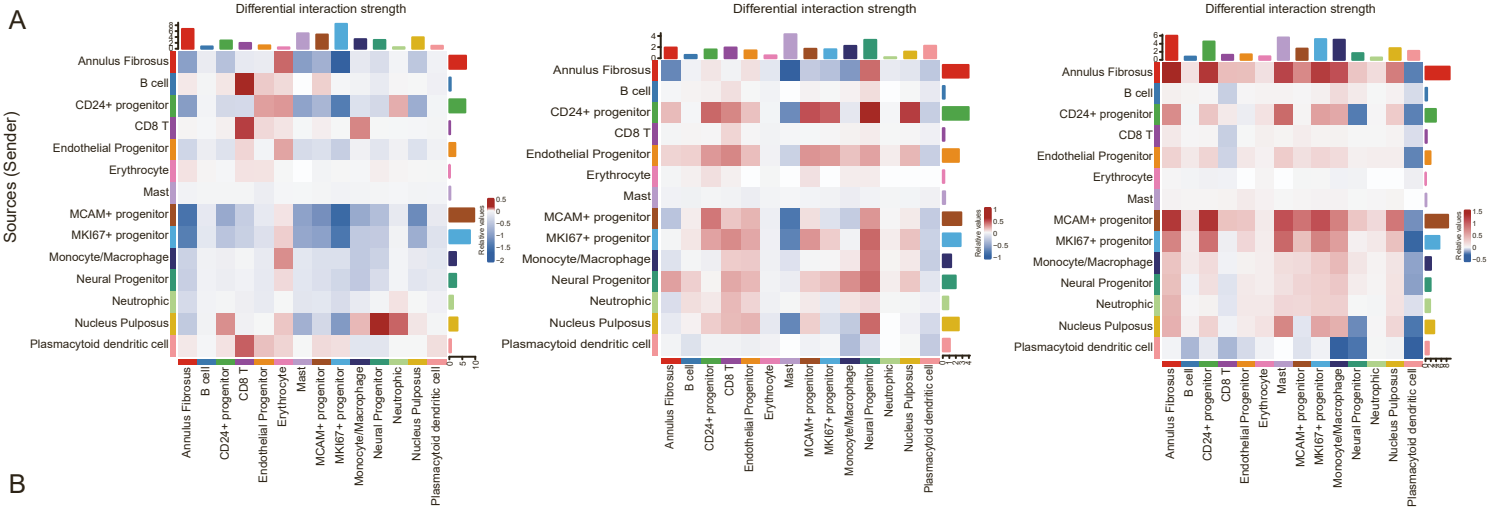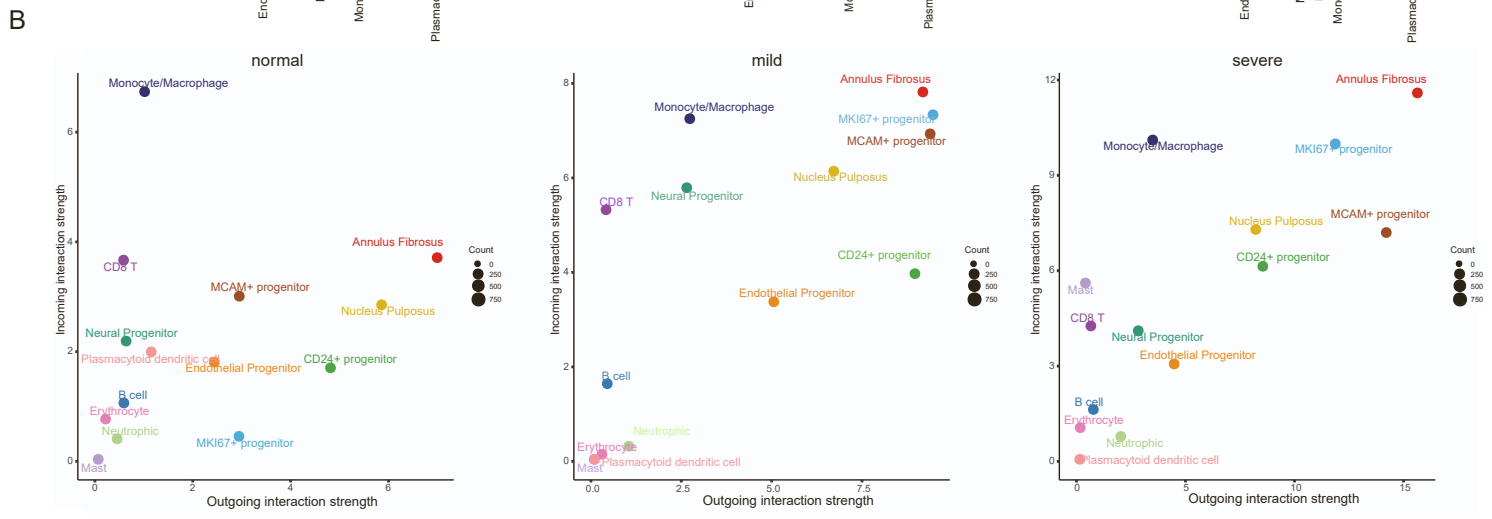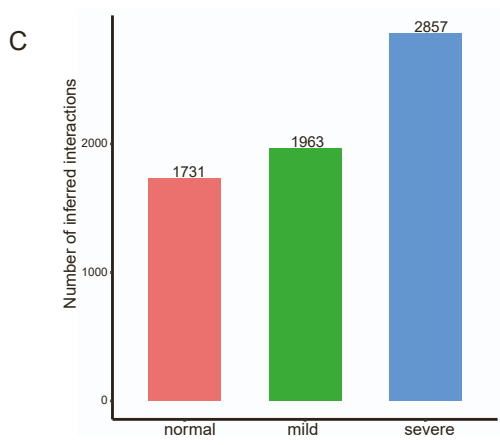

**Supplementary Fig. 5 Intercellular crosstalk analysis among NP cells, AF cells, progenitors, and immune cells in the degeneration process of human IVD, Related to Figure 7.**

(A) Heatmap showing the intercellular crosstalk among NP cells, AF cells, progenitors, and immune cells in normal (D1), mild (D2-3) and severe (D4-5) degenerated IVDs. Height of column represent differential interaction strength between corresponding two cell clusters compared with other groups. (B) Outgoing and incoming interaction strength of NP cells, AF cells, progenitors, and immune cells in normal, mild and severe degenerated IVDs. Dots indicate the ligand amount. (C) Histogram showing the number of inferred interactions between NP cells, AF cells, progenitors, and immune cells in normal, mild and severe degenerated IVDs.

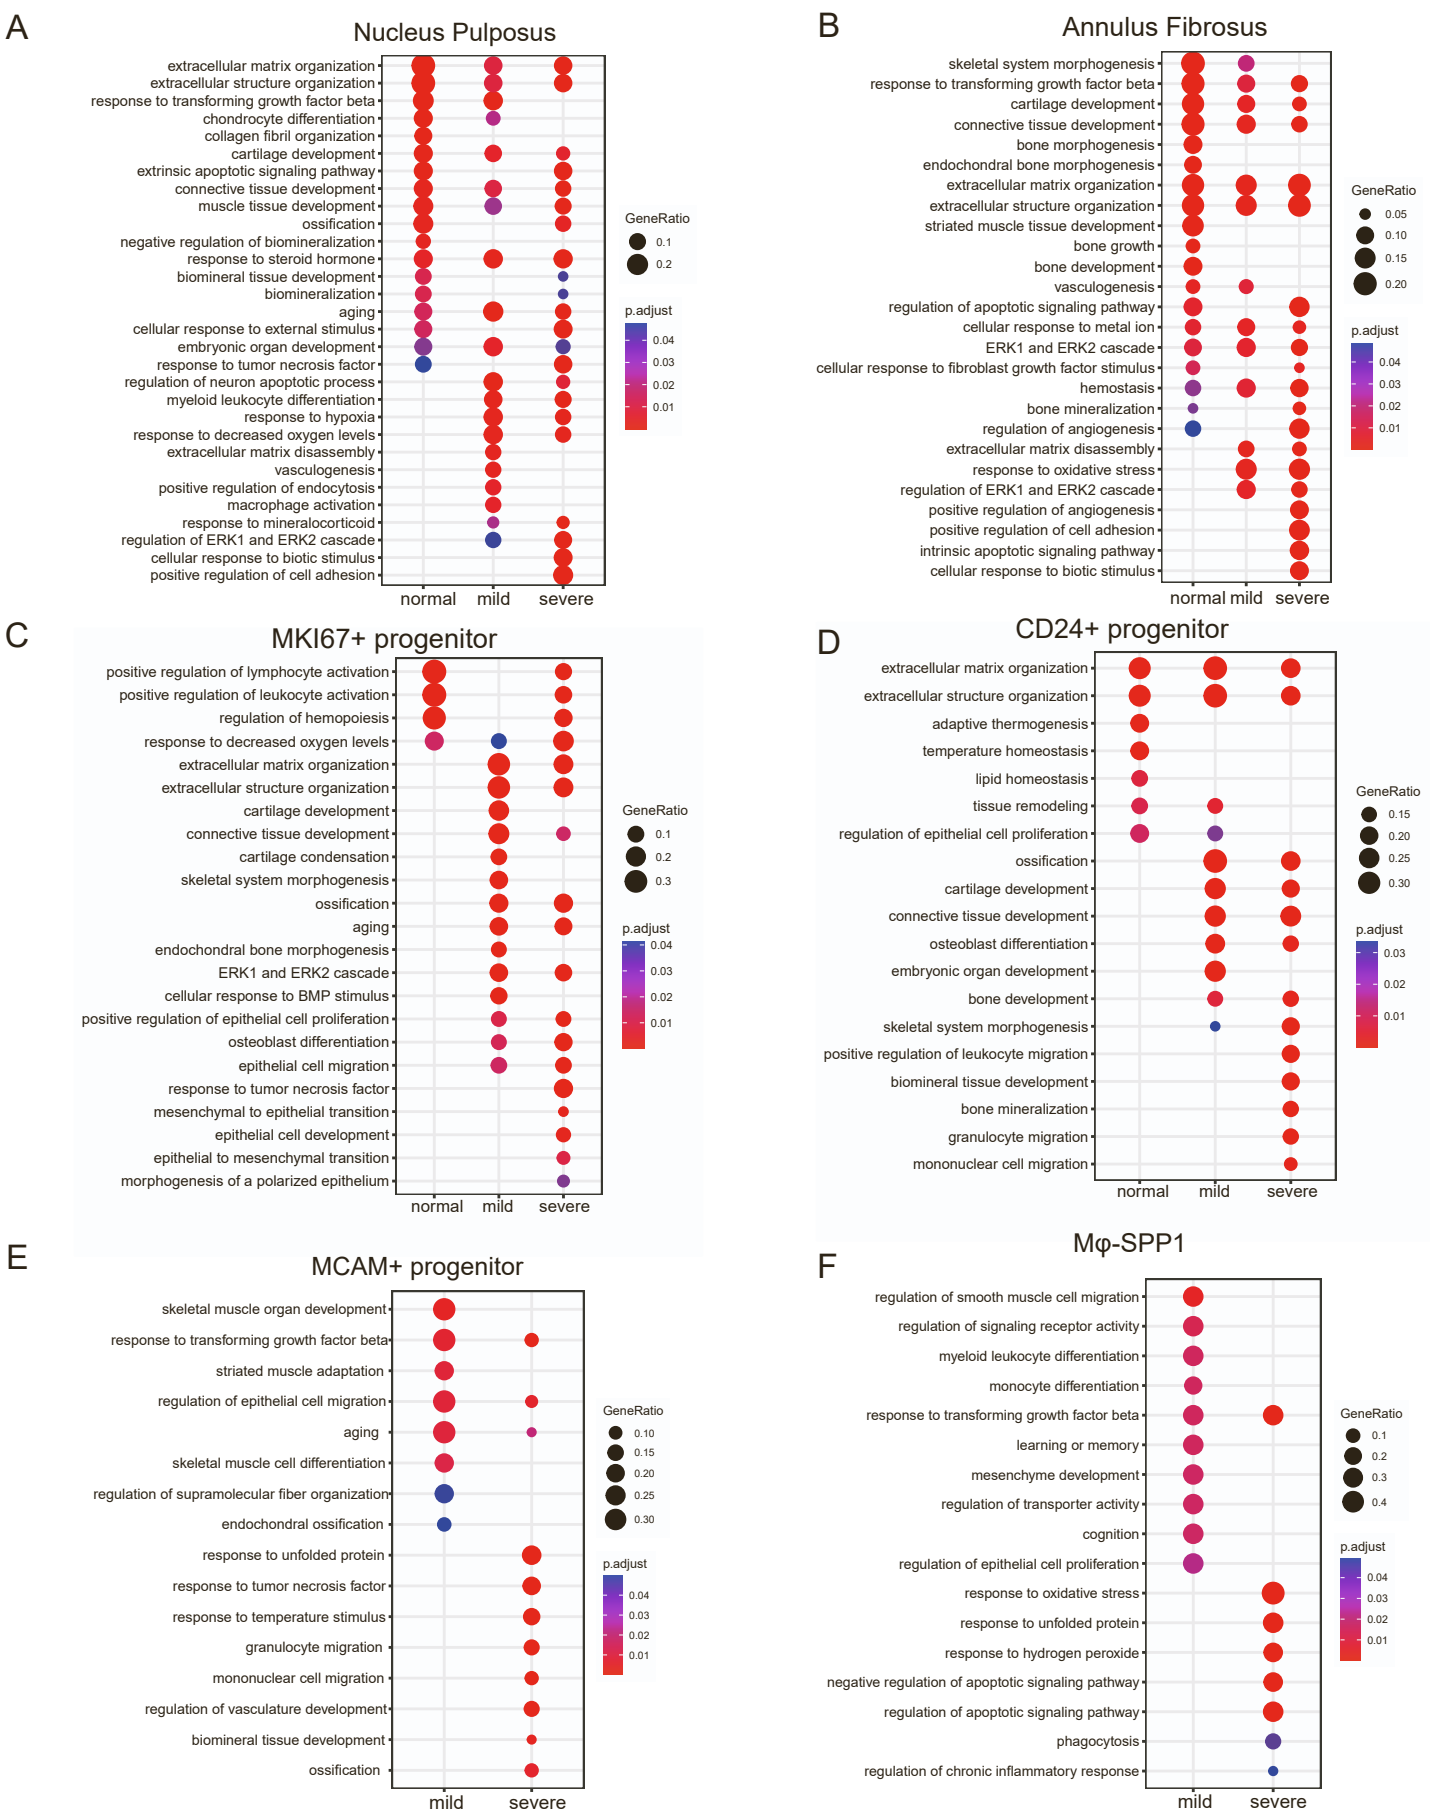

**Supplementary Fig. 6** The GO functions of NP (A), AF (B), CD24+ progenitor (C), MKI67+ progenitor (D), MCAM+ progenitor (E), and Mφ-SPP1 clusters (F) regulated by ligands of other cell clusters in normal (D1), mild (D2-3) and severe (D4-5) degenerated grades of IVDs, Related to Figure 7.
